# Supplementary material for: Targeting Tat-TAR RNA Interaction for HIV-1 Inhibition
Source: Preprints.org preprint supplement (doi:10.20944/preprints202106.0565.v1), 2021-06-23
Supplement: Supplementary file 1 [file supplementary]

## Supplemental Fig. 1

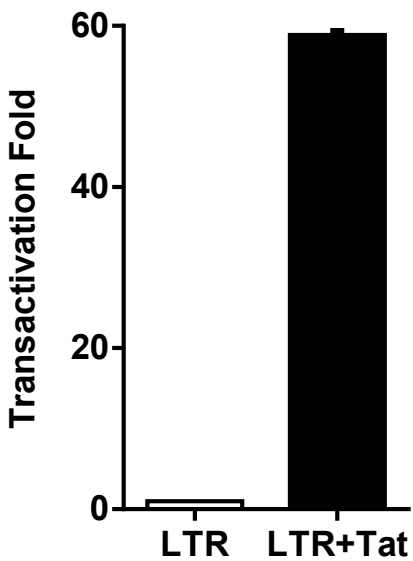

**Supplemental Figure 1. Activation of HIV-1 transcription by Tat.** 293T cells were transfected with vectors expressing HIV-1 LTR-*Luciferase* (lane 1) or HIV-1 LTR-*Luciferase* and HIV-1 Tat expression vectors (lane 2). After 24 hours of culturing, the cells were lysed and luciferase activity was determined using LuciLite assay.

## Supplemental Fig. 2

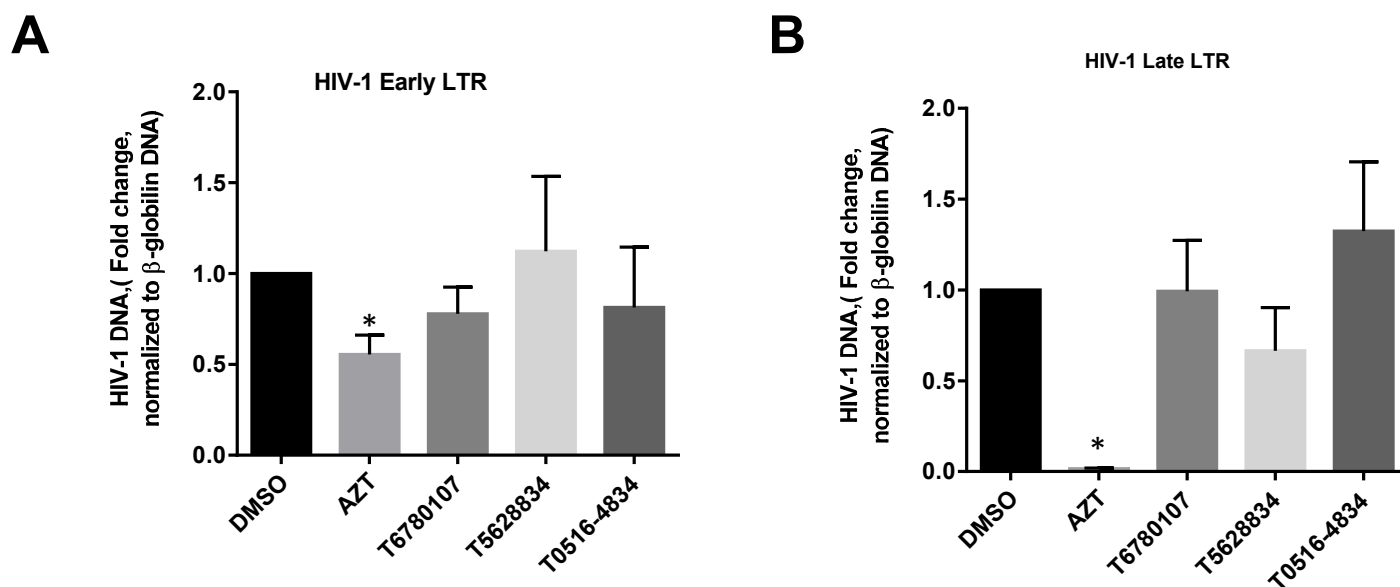

**Supplemental Figure 2. No effect of Tat-TAR RNA targeting compounds on HIV-1 reverse transcription.** PBMCs were activated with PHA and IL-2 and infected with HIV-1-LUC-G. At 6 hrs p.i. DNA was extracted and analyzed by real-time PCR on Roche 4800 using primers for early LTR (panel A) and late LTR (panel) and  $\beta$ -globin gene as a reference. Azidothymidine (AZT) was used as control. The means  $\pm$  SD are shown ( $n=3$  for each sample). Asterisk indicate  $p < 0.05$ .
